# Supplementary material
Source: PubMed Central journal article supplement (PMC3906390)
Supplement: hvi-9-2060-s01.pdf [file hvi-9-2060-s01.pdf]

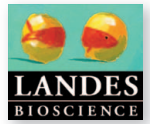

## **Supplemental Material to:**

**Leonard Moise, Ryan Tassone, Howard Latimer,  
Frances Terry, Lauren Levitz, John P Haran, Ted M Ross,  
Christine Boyle, William D Martin, Anne S De Groot**

**Immunization with cross-conserved H1N1 influenza  
CD4+ T-cell epitopes lowers viral burden in HLA DR3  
transgenic mice**

**Human Vaccines & Immunotherapeutics 2013; 9(10)  
<http://dx.doi.org/10.4161/hv.26511>**

**[www.landesbioscience.com/journals/vaccines/article/26511](http://www.landesbioscience.com/journals/vaccines/article/26511)**

**Table S1.** Cultured human IFN $\gamma$  ELISpot responses elicited by cross-conserved epitopes before and after 2010-2011 TIV vaccination.

| Stimulation         | 182             |             |              |                  |      |         | 311             |              |              |                  |              |              |
|---------------------|-----------------|-------------|--------------|------------------|------|---------|-----------------|--------------|--------------|------------------|--------------|--------------|
|                     | Pre-vaccination |             |              | Post-Vaccination |      |         | Pre-vaccination |              |              | Post-Vaccination |              |              |
|                     | SFC             | SI          | p-value      | SFC              | SI   | p-value | SFC             | SI           | p-value      | SFC              | SI           | p-value      |
| 38-61               | 40              | 1.17        | 0.218        | 80               | 1.17 | 0.327   | -5              | 0.57         | 0.516        | 3                | 0.33         | 0.170        |
| 112-129             | -103            | 0.81        | 0.093        | -                | 0.74 | 0.037   | -8              | 0.29         | 0.366        | 0                | 0.00         | 0.516        |
| 129-140             | -               | -           | -            | -                | -    | -       | <b>118</b>      | <b>11.14</b> | <b>0.000</b> | 3                | 0.33         | 0.626        |
| 319-345             | -30             | 0.90        | 0.463        | 3                | 1.01 | 0.960   | <b>435</b>      | <b>38.29</b> | <b>0.000</b> | <b>177</b>       | <b>17.67</b> | <b>0.000</b> |
| 321-341             | 90              | 1.29        | 0.033        | 187              | 1.39 | 0.049   | <b>78</b>       | <b>7.71</b>  | <b>0.000</b> | 40               | 4.00         | 0.000        |
| 396-417             | <b>580</b>      | <b>2.09</b> | <b>0.003</b> | 220              | 1.74 | 0.019   | 18              | 2.57         | 0.068        | 20               | 2.00         | 0.034        |
| 432-453             | 53              | 1.18        | 0.183        | 77               | 1.16 | 0.521   | <b>162</b>      | <b>14.86</b> | <b>0.001</b> | 27               | 2.67         | 0.005        |
| 456-480             | 90              | 1.25        | 0.177        | 167              | 1.52 | 0.006   | 48              | 5.14         | 0.002        | <b>70</b>        | <b>7.00</b>  | <b>0.000</b> |
| 516-540             | 27              | 1.19        | 0.250        | 80               | 1.22 | 0.118   | -8              | 0.29         | 0.366        | 0                | 0.00         | 0.516        |
| 548-563             | 217             | 1.49        | 0.019        | 63               | 1.15 | 0.160   | -12             | 0.00         | 0.139        | 0                | 0.00         | 1.000        |
| Pool                | 773             | 0.90        | 0.523        | 423              | 1.16 | 0.169   | <b>255</b>      | <b>22.86</b> | <b>0.000</b> | <b>440</b>       | <b>44.00</b> | <b>0.000</b> |
| % Peptides Positive | 11%             |             |              | 0%               |      |         | 40%             |              |              | 20%              |              |              |

**Table S1. continued**

| Stimulation         | 720             |              |              |                  |              |              | 844             |             |              |                  |             |              |
|---------------------|-----------------|--------------|--------------|------------------|--------------|--------------|-----------------|-------------|--------------|------------------|-------------|--------------|
|                     | Pre-vaccination |              |              | Post-Vaccination |              |              | Pre-vaccination |             |              | Post-Vaccination |             |              |
|                     | SFC             | SI           | p-value      | SFC              | SI           | p-value      | SFC             | SI          | p-value      | SFC              | SI          | p-value      |
| 38-61               | -35             | 0.70         | 0.262        | -                | 0.34         | 0.000        | 0               | 1.00        | 1.000        | -                | -           | -            |
| 112-129             | -82             | 0.29         | 0.058        | -108             | 0.77         | 0.731        | -10             | 0.92        | 0.923        | -                | -           | -            |
| 129-140             | <b>168</b>      | <b>2.46</b>  | <b>0.004</b> | 98               | 1.60         | 0.006        | 20              | 1.17        | 0.432        | -                | -           | -            |
| 319-345             | <b>732</b>      | <b>7.36</b>  | <b>0.000</b> | <b>782</b>       | <b>5.74</b>  | <b>0.000</b> | 53              | 1.44        | 0.102        | 37               | 2.38        | 0.111        |
| 321-341             | <b>162</b>      | <b>2.41</b>  | <b>0.001</b> | 108              | 1.66         | 0.027        | 47              | 1.39        | 0.133        | 37               | 2.38        | 0.173        |
| 396-417             | <b>218</b>      | <b>2.90</b>  | <b>0.000</b> | 98               | 1.60         | 0.005        | 37              | 1.31        | 0.243        | 47               | 2.75        | 0.027        |
| 432-453             | <b>402</b>      | <b>4.49</b>  | <b>0.000</b> | <b>438</b>       | <b>3.66</b>  | <b>0.000</b> | 33              | 1.28        | 0.304        | 47               | 2.75        | 0.094        |
| 456-480             | -15             | 0.87         | 0.799        | -35              | 0.79         | 0.636        | 70              | 1.58        | 0.168        | 230              | 9.63        | 0.257        |
| 516-540             | <b>505</b>      | <b>5.39</b>  | <b>0.000</b> | <b>518</b>       | <b>4.14</b>  | <b>0.000</b> | <b>163</b>      | <b>2.36</b> | <b>0.001</b> | 323              | 13.13       | 0.131        |
| 548-563             | <b>178</b>      | <b>29.33</b> | <b>0.001</b> | <b>92</b>        | <b>11.00</b> | <b>0.011</b> | 3               | 1.54        | 0.877        | -                | -           | -            |
| Pool                | <b>1222</b>     | <b>11.62</b> | <b>0.000</b> | <b>855</b>       | <b>6.18</b>  | <b>0.000</b> | 93              | 1.78        | 0.016        | <b>50</b>        | <b>2.88</b> | <b>0.028</b> |
| % Peptides Positive | 70%             |              |              | 40%              |              |              | 10%             |             |              | 0%               |             |              |

Table S1. continued

| Stimulation         | 923             |             |              |                  |             |              | 1003            |               |              |                  |              |              |
|---------------------|-----------------|-------------|--------------|------------------|-------------|--------------|-----------------|---------------|--------------|------------------|--------------|--------------|
|                     | Pre-vaccination |             |              | Post-Vaccination |             |              | Pre-vaccination |               |              | Post-Vaccination |              |              |
|                     | SFC             | SI          | p-value      | SFC              | SI          | p-value      | SFC             | SI            | p-value      | SFC              | SI           | p-value      |
| 38-61               | 17              | 1.07        | 0.706        | -40              | 0.89        | 0.451        | 13              | 2.18          | 0.043        | 2                | 1.04         | 0.934        |
| 112-129             | 90              | 1.39        | 0.236        | 37               | 1.10        | 0.009        | 13              | 1.82          | 0.336        | -18              | 0.59         | 0.365        |
| 129-140             | -3              | 0.99        | 0.721        | <b>460</b>       | <b>2.31</b> | <b>0.000</b> | <b>1630</b>     | <b>81.45</b>  | <b>0.000</b> | <b>2425</b>      | <b>54.89</b> | <b>0.000</b> |
| 319-345             | <b>510</b>      | <b>3.22</b> | <b>0.000</b> | <b>1777</b>      | <b>6.08</b> | <b>0.000</b> | <b>107</b>      | <b>8.91</b>   | <b>0.000</b> | 38               | 1.85         | 0.140        |
| 321-341             | 147             | 1.64        | 0.020        | <b>377</b>       | <b>2.08</b> | <b>0.001</b> | <b>90</b>       | <b>6.73</b>   | <b>0.000</b> | <b>52</b>        | <b>2.15</b>  | <b>0.023</b> |
| 396-417             | 123             | 1.54        | 0.070        | <b>460</b>       | <b>2.31</b> | <b>0.000</b> | <b>500</b>      | <b>29.45</b>  | <b>0.000</b> | <b>462</b>       | <b>11.26</b> | <b>0.000</b> |
| 432-453             | <b>417</b>      | <b>2.81</b> | <b>0.000</b> | <b>677</b>       | <b>2.93</b> | <b>0.000</b> | <b>197</b>      | <b>13.45</b>  | <b>0.000</b> | <b>195</b>       | <b>5.33</b>  | <b>0.000</b> |
| 456-480             | -10             | 0.96        | 0.620        | 133              | 1.38        | 0.081        | <b>177</b>      | <b>13.27</b>  | <b>0.000</b> | <b>202</b>       | <b>5.48</b>  | <b>0.000</b> |
| 516-540             | 110             | 1.48        | 0.035        | <b>787</b>       | <b>3.25</b> | <b>0.000</b> | 33              | 4.00          | 0.001        | 45               | 2.00         | 0.045        |
| 548-563             | 63              | 17.60       | 0.161        | <b>300</b>       | <b>5.13</b> | <b>0.004</b> | 7               | 1.45          | 0.556        | -15              | 0.67         | 0.476        |
| Pool                | <b>830</b>      | <b>4.61</b> | <b>0.000</b> | <b>3033</b>      | <b>9.67</b> | <b>0.000</b> | <b>1885</b>     | <b>103.82</b> | <b>0.000</b> | <b>2135</b>      | <b>48.44</b> | <b>0.000</b> |
| % Peptides Positive | 20%             |             |              | 70%              |             |              | 60%             |               |              | 50%              |              |              |

Table S1. continued

| Stimulation         | 1434            |             |              |                  |             |              | 1438            |              |              |                  |              |              |
|---------------------|-----------------|-------------|--------------|------------------|-------------|--------------|-----------------|--------------|--------------|------------------|--------------|--------------|
|                     | Pre-vaccination |             |              | Post-Vaccination |             |              | Pre-vaccination |              |              | Post-Vaccination |              |              |
|                     | SFC             | SI          | p-value      | SFC              | SI          | p-value      | SFC             | SI           | p-value      | SFC              | SI           | p-value      |
| 38-61               | 7               | 1.06        | 0.761        | -23              | 0.85        | 0.262        | 8               | 0.91         | 0.892        | 0                | 1.11         | 0.863        |
| 112-129             | 23              | 1.22        | 0.423        | -10              | 0.93        | 0.892        | -2              | 0.55         | 0.199        | 7                | 1.33         | 0.445        |
| 129-140             | <b>133</b>      | <b>2.25</b> | <b>0.000</b> | 60               | 1.39        | 0.048        | 18              | 1.27         | 0.626        | 20               | 2.22         | 0.078        |
| 319-345             | 77              | 1.72        | 0.003        | 133              | 1.87        | 0.000        | <b>88</b>       | <b>7.09</b>  | <b>0.000</b> | <b>260</b>       | <b>15.11</b> | <b>0.000</b> |
| 321-341             | 47              | 1.44        | 0.086        | 3                | 1.02        | 0.772        | <b>68</b>       | <b>4.36</b>  | <b>0.001</b> | <b>130</b>       | <b>10.89</b> | <b>0.001</b> |
| 396-417             | <b>223</b>      | <b>3.09</b> | <b>0.002</b> | 53               | 1.35        | 0.122        | -2              | 1.09         | 0.722        | <b>57</b>        | <b>6.22</b>  | <b>0.002</b> |
| 432-453             | <b>117</b>      | <b>2.09</b> | <b>0.001</b> | <b>230</b>       | <b>2.50</b> | <b>0.000</b> | <b>168</b>      | <b>11.27</b> | <b>0.000</b> | <b>620</b>       | <b>40.44</b> | <b>0.000</b> |
| 456-480             | <b>133</b>      | <b>2.25</b> | <b>0.015</b> | -20              | 0.87        | 0.534        | 32              | 3.27         | 0.000        | <b>53</b>        | <b>4.89</b>  | <b>0.000</b> |
| 516-540             | <b>410</b>      | <b>4.84</b> | <b>0.000</b> | -30              | 0.80        | 0.356        | 5               | 2.00         | 0.125        | 7                | 1.33         | 0.329        |
| 548-563             | 60              | 10.00       | 0.098        | 7                | 2.67        | 0.782        | 45              | 24.00        | 0.018        | 33               | 0.73         | 0.422        |
| Pool                | <b>480</b>      | <b>5.50</b> | <b>0.000</b> | <b>477</b>       | <b>4.11</b> | <b>0.000</b> | <b>658</b>      | <b>36.91</b> | <b>0.000</b> | <b>392</b>       | <b>27.11</b> | <b>0.000</b> |
| % Peptides Positive | 50%             |             |              | 10%              |             |              | 30%             |              |              | 50%              |              |              |

Immunoreactivity data for influenza cross-conserved peptides are presented from cultured IFN $\gamma$  ELISpot assays performed for sixteen human subjects. An ELISpot response was considered positive if three criteria were met: (1) spot-forming cells (SFC) per million PBMC were at least 50, (2) SFC per million PBMC were at least two-fold over background, and (3) SFC per million PBMC were statistically different from “no stimulus” measurements by the Student’s t-test ( $p < 0.05$ ). Results that meet individual criteria are highlighted in gray. Results that meet all three criteria are denoted in bold. Column headers: human subject ID code; numbers of spot forming cells per million PBMCs that secrete IFN $\gamma$  in response to individual and pooled cross-conserved peptides (SFC); stimulation indices (SI); and Student’s t-test results (p-value); and percent of subjects responding. Row labels: peptide ID. Epitopes are grouped according to their source antigen, either HA or NA.
